# Supplementary material for: Integrative View of α2,3-Sialyltransferases (ST3Gal) Molecular and Functional Evolution in Deuterostomes: Significance of Lineage-Specific Losses
Source: PubMed Central journal article supplement — Mol Biol Evol. 2014 Dec 21;32(4):906–27. doi: 10.1093/molbev/msu395 (PMC4379398; doi:10.1093/molbev/msu395), 2014-12-21
Supplement: supp_msu395_Table_S1-S3.pdf [file supp_msu395_Table_S1-S3.pdf]

## SUPPORTING FILES

**Integrative view of  $\alpha$ 2,3-sialyltransferases (ST3Gal) molecular and functional evolution in deuterostomes: significance of lineage specific losses.**

**Daniel Petit, Elin Teppa, Anne-Marie Mir, Dorothée Vicogne, Christine Thisse, Bernard Thisse, Cyril Filloux and Anne Harduin-Lepers**

### **1- Supplemental Tables: Nomenclature, name and accession number of *st3gal* gene sequences identified and used in this study**

**Table S1:** Nomenclature, name and accession number in INSDC (GenBank/ENA/DDBJ) of *st3gal* gene sequences

**Table S2:** Nomenclature, name and contig/scaffold number of amphibian *st3gal* gene sequences in specialized databases (Xenbase and Sal-site)

**Table S3.** Tissue diversity of *st3gal* gene expression in several vertebrate models. For each species and gene, Shannon index was calculated from the log-transformed values of EST numbers recorded in each tissue (see material and method section). The dataset of selected tissues was the same as for the construction of figure S9. A null value corresponds to an expression limited to one tissue, and a dash a total absence of expression in any tissue. The background darkness is related to the value level.

**Table S1:** Nomenclature, name and accession number in GenBank/EMBL/DDBJ of *st3gal* gene sequences identified and used in this study. The name of the organism and length of the predicted protein are indicated.

| <i>subfamily</i>            | <i>organism</i>                  | <i>Acc Nber GenBank</i> | <i>length</i> |
|-----------------------------|----------------------------------|-------------------------|---------------|
| <b><i>ST3Gal8</i> (GR1)</b> |                                  |                         |               |
| <i>ST3Gal8</i>              | <i>Proteropterus aethiopicus</i> | FL668363                | 265           |
| <i>ST3Gal8</i>              | <i>Anolis carolinensis</i>       | XM_003220475            | 326           |
| <i>ST3Gal8</i>              | <i>Chrysemys picta bellii</i>    | HG531973                | 329           |
| <i>ST3Gal8</i>              | <i>Danio rerio</i>               | AJ783740                | 341           |
| <i>ST3Gal8</i>              | <i>Latimeria chalumnae</i>       | HG531974                | 332           |
| <i>ST3Gal8</i>              | <i>Melopsittacus undulatus</i>   | XM_005147589            | 319           |
| <i>ST3Gal8</i>              | <i>Silurana tropicalis</i>       | AJ585763                | 332           |
| <i>ST3Gal8A</i>             | <i>Xenopus laevis</i>            | AJ585762                | 332           |
| <i>ST3Gal8B</i>             | <i>Xenopus laevis</i>            | HG531975                | 332           |
| <i>ST3Gal8</i>              | <i>Gallus gallus</i>             | XM_417321               | 313           |
| <i>ST3Gal8</i>              | <i>Python bivittatus</i>         | HG531976                | 328           |
| <i>ST3Gal8</i>              | <i>Lepisosteus oculatus</i>      | HG531977                | 340           |
| <b><i>ST3Gal2</i> (GR1)</b> |                                  |                         |               |
| <i>ST3Gal2</i>              | <i>Anolis carolinensis</i>       | GADO01065579            | 350           |
| <i>ST3Gal2</i>              | <i>Bos taurus</i>                | AJ748841                | 350           |
| <i>ST3Gal2</i>              | <i>Chrysemys picta bellii</i>    | HG531978                | 347           |
| <i>ST3Gal2</i>              | <i>Danio rerio</i>               | AJ783741                | 374           |
| <i>ST3Gal2</i>              | <i>Gallus gallus</i>             | AJ585761                | 349           |
| <i>ST3Gal2</i>              | <i>Homo sapiens</i>              | X96667                  | 350           |
| <i>ST3Gal2</i>              | <i>Latimeria chalumnae</i>       | HG531979                | 349           |
| <i>ST3Gal2</i>              | <i>Loxodonta africana</i>        | XM_003417075            | 350           |
| <i>ST3Gal2</i>              | <i>Monodelphis domestica</i>     | XM_001362558            | 350           |
| <i>ST3Gal2</i>              | <i>Ornithorhynchus anatinus</i>  | XM_003431271            | 350           |
| <i>ST3Gal2</i>              | <i>Petromyzon marinus</i>        | HG531980                | >309          |
| <i>ST3Gal2</i>              | <i>Python bivittatus</i>         | HG531981                | 347           |
| <i>ST3Gal2</i>              | <i>Silurana tropicalis</i>       | XM_002931660            | 351           |
| <i>ST3Gal2</i>              | <i>Taeniopygia guttata</i>       | XM_002188528            | 348           |
| <i>ST3Gal2</i>              | <i>Takifugu rubripes</i>         | AJ626817                | 376           |
| <b><i>ST3Gal1</i> (GR1)</b> |                                  |                         |               |
| <i>ST3Gal1</i>              | <i>Anolis carolinensis</i>       | XM_003219376            | 342           |
| <i>ST3Gal1</i>              | <i>Bos taurus</i>                | NM_001097983            | 339           |
| <i>ST3Gal1</i>              | <i>Chrysemys picta bellii</i>    | HG531982                | 360           |
| <i>ST3Gal1</i>              | <i>Gallus gallus</i>             | X80503                  | 342           |
| <i>ST3Gal1</i>              | <i>Homo sapiens</i>              | L29555                  | 340           |
| <i>ST3Gal1A</i>             | <i>Latimeria chalumnae</i>       | HG531983                | 342           |
| <i>ST3Gal1B</i>             | <i>Latimeria chalumnae</i>       | HG531984                | 342           |
| <i>ST3Gal1</i>              | <i>Lepisosteus oculatus</i>      | HG531985                | 329           |
| <i>ST3Gal1</i>              | <i>Loxodonta africana</i>        | XM_003408191            | 340           |
| <i>ST3Gal1</i>              | <i>Monodelphis domestica</i>     | XM_001381537            | 342           |
| <i>ST3Gal1</i>              | <i>Oryzias latipes</i>           | AJ871407                | 334           |
| <i>ST3Gal1</i>              | <i>Python bivittatus</i>         | HG531986                | >335          |
| <i>ST3Gal1</i>              | <i>Silurana tropicalis</i>       | FN550106                | 334           |

|                                           |                                 |              |      |
|-------------------------------------------|---------------------------------|--------------|------|
| <i>ST3Gal1</i>                            | <i>Taeniopygia guttata</i>      | XM_002188126 | 341  |
| <i>ST3Gal1</i>                            | <i>Takifugu rubripes</i>        | AJ626816     | 333  |
| <i>ST3Gal1</i>                            | <i>Tetraodon nigroviridis</i>   | AJ744802     | 334  |
| <b><i>ST3Gal5 (GR3)</i></b>               |                                 |              |      |
| <i>ST3Gal5</i>                            | <i>Anolis carolinensis</i>      | XM_003226613 | 370  |
| <i>ST3Gal5</i>                            | <i>Callorhinchus milii</i>      | HG532005     | >301 |
| <i>ST3Gal5</i>                            | <i>Lepisosteus oculatus</i>     | HG531987     | >316 |
| <i>ST3Gal5</i>                            | <i>Danio rerio</i>              | AJ619960     | 364  |
| <i>ST3Gal5</i>                            | <i>Gallus gallus</i>            | AY515255     | 363  |
| <i>ST3Gal5</i>                            | <i>Homo sapiens</i>             | AB018356     | 362  |
| <i>ST3Gal5</i>                            | <i>Monodelphis domestica</i>    | XM_001379503 | 362  |
| <i>ST3Gal5</i>                            | <i>Mus musculus</i>             | Y15003       | 358  |
| <i>ST3Gal5</i>                            | <i>Ornithorhynchus anatinus</i> | HG531988     | 384  |
| <i>ST3Gal5</i>                            | <i>Petromyzon marinus</i>       | HG531989     | >331 |
| <i>ST3Gal5</i>                            | <i>Silurana tropicalis</i>      | FN550108     | 372  |
| <i>ST3Gal5</i>                            | <i>Takifugu rubripes</i>        | AJ865087     | 316  |
| <i>ST3Gal5</i>                            | <i>Taeniopygia guttata</i>      | XM_002186654 | 368  |
| <b><i>ST3Gal7 (GR3)</i></b>               |                                 |              |      |
| <i>ST3Gal7</i>                            | <i>Danio rerio</i>              | AJ783742     | 383  |
| <i>ST3Gal7</i>                            | <i>Oryzias latipes</i>          | AJ871411     | 386  |
| <i>ST3Gal7</i>                            | <i>Takifugu rubripes</i>        | AJ865347     | 386  |
| <i>ST3Gal7</i>                            | <i>Lepisosteus oculatus</i>     | HG531990     | 365  |
| <b><i>ST3Gal3 and ST3Gal3-r (GR3)</i></b> |                                 |              |      |
| <i>ST3Gal3</i>                            | <i>Anolis carolinensis</i>      | XM_003220202 | 390  |
| <i>ST3Gal3</i>                            | <i>Danio rerio</i>              | AJ626821     | 355  |
| <i>ST3Gal3-r</i>                          | <i>Danio rerio</i>              | AJ626820     | 372  |
| <i>ST3Gal3</i>                            | <i>Gallus gallus</i>            | AJ865086     | 374  |
| <i>ST3Gal3</i>                            | <i>Gasterosteus aculeatus</i>   | HG531992     | 370  |
| <i>ST3Gal 3-r</i>                         | <i>Gasterosteus aculeatus</i>   | HG531991     | 356  |
| <i>ST3Gal3</i>                            | <i>Lepisosteus oculatus</i>     | HG531993     | 333  |
| <i>ST3Gal3</i>                            | <i>Latimeria chalumnae</i>      | HG531994     | 375  |
| <i>ST3Gal3</i>                            | <i>Homo sapiens</i>             | L23768       | 444  |
| <i>ST3Gal3</i>                            | <i>Xenopus laevis</i>           | BC169739     | 360  |
| <i>ST3Gal3</i>                            | <i>Meleagris gallopavo</i>      | XM_003208778 | 390  |
| <i>ST3Gal3</i>                            | <i>Mus musculus</i>             | X84234       | 374  |
| <i>ST3Gal3</i>                            | <i>Python bivittatus</i>        | HG531995     | 369  |
| <i>ST3Gal3</i>                            | <i>Oryzias latipes</i>          | HG531996     | 371  |
| <i>ST3Gal3</i>                            | <i>Silurana tropicalis</i>      | AJ626823     | 374  |
| <i>ST3Gal3</i>                            | <i>Taeniopygia guttata</i>      | XM_002192118 | 374  |
| <i>ST3Gal3</i>                            | <i>Takifugu rubripes</i>        | AJ626818     | 356  |
| <b><i>ST3Gal6 (GR2)</i></b>               |                                 |              |      |
| <i>ST3Gal6</i>                            | <i>Homo sapiens</i>             | AF119391     | 331  |
| <i>ST3Gal6</i>                            | <i>Mus musculus</i>             | AF119390     | 331  |
| <i>ST3Gal6</i>                            | <i>Gallus gallus</i>            | AJ585767     | 329  |
| <i>ST3Gal6</i>                            | <i>Anolis carolinensis</i>      | GAFZ01198187 | 327  |
| <i>ST3Gal6</i>                            | <i>Latimeria chalumnae</i>      | HG531997     | 329  |
| <i>ST3Gal6</i>                            | <i>Silurana tropicalis</i>      | AJ626744     | 331  |

|                                           |                                        |              |      |
|-------------------------------------------|----------------------------------------|--------------|------|
| <i>ST3Gal6</i>                            | <i>Taeniopygia guttata</i>             | XP_002194132 | 356  |
| <i>ST3Gal6</i>                            | <i>Meleagris gallopavo</i>             | XP_003202812 | 329  |
| <b><i>ST3Gal4 (GR2)</i></b>               |                                        |              |      |
| <i>ST3Gal4</i>                            | <i>Anolis carolinensis</i>             | XP_003225763 | 329  |
| <i>ST3Gal4</i>                            | <i>Callorhinchus milii</i>             | HG531998     | >243 |
| <i>ST3Gal4</i>                            | <i>Danio rerio</i>                     | AJ744809     | 332  |
| <i>ST3Gal4</i>                            | <i>Gallus gallus</i>                   | AJ866777     | 328  |
| <i>ST3Gal4</i>                            | <i>Homo sapiens</i>                    | L23767       | 333  |
| <i>ST3Gal4</i>                            | <i>Latimeria chalumnae</i>             | HG531999     | >181 |
| <i>ST3Gal4</i>                            | <i>Meleagris gallopavo</i>             | XM_003212645 | 328  |
| <i>ST3Gal4</i>                            | <i>Mus musculus</i>                    | X95809       | 333  |
| <i>ST3Gal4</i>                            | <i>Silurana tropicalis</i>             | AJ622908     | 330  |
| <i>ST3Gal4</i>                            | <i>Takifugu rubripes</i>               | AJ865346     | 272  |
| <i>ST3Gal4</i>                            | <i>Python bivittatus</i>               | HG532000     | 342  |
| <i>ST3Gal4</i>                            | <i>Lepisosteus oculatus</i>            | HG532001     | 381  |
| <b><i>ST3Gal9 (GR2)</i></b>               |                                        |              |      |
| <i>ST3Gal9</i>                            | <i>Gallus gallus</i>                   | XM_004945803 | 394  |
| <i>ST3Gal9</i>                            | <i>Meleagris gallopavo</i>             | HG532002     | 312  |
| <i>ST3Gal9</i>                            | <i>Ornithorhynchus anatinus</i>        | XM_001508863 | 322  |
| <i>ST3Gal9</i>                            | <i>Pelodiscus sinensis</i>             | HG532003     | 365  |
| <b><i>ST3Gal1/2/8 (GR1)</i></b>           |                                        |              |      |
|                                           | <i>Ciona intestinalis</i>              | AJ703817     | 379  |
|                                           | <i>Ciona savignyi</i>                  | AJ626814     | 374  |
|                                           | <i>Branchiostoma lanceolatum</i>       | HG532006     | 312  |
|                                           | <i>Branchiostoma floridae</i>          | XM_002604587 | 377  |
|                                           | <i>Saccoglossus kowalevskii</i>        | XM_002741450 | 350  |
|                                           | <i>Strongylocentrotus purpuratus</i>   | AM420340     | 357  |
|                                           | <i>Oscarella carmela</i>               | HG532004     | 374  |
| <b><i>ST3Gal3/3-r/5/7 (GR3)</i></b>       |                                        |              |      |
|                                           | <i>Strongylocentrotus purpuratus A</i> | XM_001184759 | 398  |
|                                           | <i>Strongylocentrotus purpuratus B</i> | XM_003730192 | 472  |
|                                           | <i>Strongylocentrotus purpuratus C</i> | XM_776047    | 335  |
|                                           | <i>Branchiostoma floridae</i>          | XM_002601289 | 480  |
| <b><i>ST3Gal3/3-r/5/7/4/6/9 (GRx)</i></b> |                                        |              |      |
|                                           | <i>Saccoglossus kowalevskii</i>        | HG532008     | 393  |
|                                           | <i>Branchiostoma lanceolatum</i>       | HG532007     | 365  |
|                                           | <i>Branchiostoma floridae</i>          | XM_002606112 | 371  |

**Table S2** : Nomenclature, name and contig/scaffold number of amphibian *st3gal* gene sequences identified and used in this study. These *st3gal* sequences were identified in specialized EST/mRNA databases available at the URL <http://www.ambystoma.org/genome-resources/21-blast> for *Ambystoma mexicanum* (1) and <http://xenbase.org/genomes/blast.do?> for *Xenopus laevis* (2). The name of the organism and length of the predicted protein are indicated. These annotated  $\alpha$ 2,3-sialyltransferase sequences are available upon request.

| <i>subfamily</i>     | <i>organism</i>            | <i>Contig/scaffold</i> | <i>Range</i>  | <i>length</i> |
|----------------------|----------------------------|------------------------|---------------|---------------|
| <i>ST3Gal8</i> (GR1) |                            |                        |               |               |
| <i>ST3Gal8</i>       | <i>Ambystoma mexicanum</i> | Contig 54315           | 1121-132      | 330           |
| <i>ST3Gal2</i> (GR1) |                            |                        |               |               |
| <i>ST3Gal2</i>       | <i>Ambystoma mexicanum</i> | Contig 108051          | 2-426         | >280          |
| <i>ST3Gal1</i> (GR1) |                            |                        |               |               |
| <i>ST3Gal1</i>       | <i>Ambystoma mexicanum</i> | Contig 144365          | 2272-1245     | 330           |
| <i>ST3Gal1</i>       | <i>Xenopus laevis</i>      | Scaffold 81582         | 672055-646912 | 336           |
| <i>ST3Gal5</i> (GR3) |                            |                        |               |               |
| <i>ST3Gal5</i>       | <i>Ambystoma mexicanum</i> | Contig 158505          | 3-1061        | >352          |
| <i>ST3Gal6</i> (GR2) |                            |                        |               |               |
| <i>ST3Gal6</i>       | <i>Ambystoma mexicanum</i> | Contig 316123          | 405-1391      | 322           |
| <i>ST3Gal4</i> (GR2) |                            |                        |               |               |
| <i>ST3Gal4</i>       | <i>Ambystoma mexicanum</i> | Contig 337204          | 408-1328      | >307          |

(1) Smith JJ, Putta S, Walker JA, Kump DK, Samuels AK, Monaghan JR, Weisrock, Staben C and Voss RS. (2005) Sal-Site: integrating new and existing ambystomatid salamander research and informational resources. BMC Genomics 6, 181. doi: 10.1186/1471-2164-6-181

(2) Bowes JB, Snyder KA, Segerdell E, Gibb R, Jarabek CJ, Pollet N, Vize PD. (2009) Xenbase: a *Xenopus* biology and genomics resource. Nucleic Acids Res., D761-7. doi:10.1093/nar/gkm826

**Table S3.** Tissue diversity of *st3gal* gene expression in several vertebrate models. For each species and gene, Shannon index was calculated from the log-transformed values of EST numbers recorded in each tissue (see material and method section). The dataset of selected tissues was the same as for the construction of figure S9. A null value corresponds to an expression limited to one tissue, and a dash a total absence of expression in any tissue. The background darkness is related to the value level.

|     | Gene           | HSA   | MMU   | BTA   | GAL   | DRE   | Mean  | St. Err |
|-----|----------------|-------|-------|-------|-------|-------|-------|---------|
| GR1 | <i>ST3Gal1</i> | 2.694 | 2.537 | 1.549 | 0.661 | 1.720 | 1.832 | 0.368   |
|     | <i>ST3Gal2</i> | 2.613 | 2.385 | 2.264 | 0.671 | 2.284 | 2.043 | 0.349   |
|     | <i>ST3Gal8</i> | -     | -     | -     | 0.693 | 1.810 | 1.251 | 0.353   |
| GR2 | <i>ST3Gal4</i> | 2.714 | 2.383 | 2.153 | 0.000 | 1.714 | 1.793 | 0.477   |
|     | <i>ST3Gal6</i> | 2.492 | 2.463 | 2.385 | 2.292 | -     | 2.408 | 0.040   |
|     | <i>ST3Gal9</i> | -     | -     | -     | 1.377 | -     | 1.377 | -       |
| GR3 | <i>ST3Gal3</i> | 2.236 | 2.380 | 2.043 | 1.383 | 2.276 | 2.064 | 0.179   |
|     | <i>ST3Gal5</i> | 2.800 | 2.283 | 2.107 | 1.375 | 2.287 | 2.170 | 0.230   |
|     | <i>ST3Gal7</i> | -     | -     | -     | -     | 1.764 | 1.764 | -       |
